# Supplementary material for: Disrupting hierarchical control of nitrogen fixation enables carbon-dependent regulation of ammonia excretion in soil diazotrophs
Source: PubMed Central journal article supplement (PMC8219145; doi:10.1371/journal.pgen.1009617), 2021-06-10
Supplement: pgen.1009617.s010.pdf [file pgen.1009617.s010.pdf]

**S1 Table. Strains used in this study**

| Strain                        | Relevant characteristic                                                                                             | Source     |
|-------------------------------|---------------------------------------------------------------------------------------------------------------------|------------|
| <i>A. vinelandii</i>          |                                                                                                                     |            |
| DJ                            | ATCC BAA-1303. High frequency transforming variant of <i>A. vinelandii</i> UW generated in 1984 by Dennis Dean      | [1]        |
| DJA                           | DJ derived. 1401 bp deletion of <i>nifA</i> gene. Mo-Nif <sup>-</sup> , Rif <sup>R</sup>                            | R.D. lab   |
| DJH                           | DJ derived. <i>nifH::tetA</i> . Mo-Nif <sup>-</sup> , Tc <sup>R</sup>                                               | This study |
| DJHZ                          | DJ derived. <i>nifH::lacZ</i> inserted into the <i>algU</i> locus. Tp <sup>R</sup>                                  | This study |
| EK                            | DJA derived. <i>nifA</i> deletion rescued by insertion of <i>nifA-E356K</i>                                         | This study |
| EKH                           | EK derived. $\Delta nifH::tetA$ insertion into the native locus. Tc <sup>R</sup>                                    | This study |
| EKHZ                          | EK derived. <i>nifH::lacZ</i> fusion inserted into the <i>algU</i> locus. Tp <sup>R</sup>                           | This study |
| EK $\Delta$ E                 | EK derived. $\Delta glnE::tmp$ insertion into the native locus. Tp <sup>R</sup>                                     | This study |
| AZBB163                       | <i>nifL::Km<sup>R</sup></i> . Spontaneous mutant from AZBB150 resulting in the Nif <sup>+</sup> phenotype           | [2]        |
| 163HZ                         | AZBB163 derived. <i>nifH::lacZ</i> inserted into the <i>algU</i> locus                                              | This study |
| <i>P. stutzeri</i>            |                                                                                                                     |            |
| A1501                         | CGMCC 0351, wild-type, isolated from rice roots inoculated with strain A15                                          | [3,4]      |
| Ps_ <i>nifLA</i> <sup>C</sup> | A1501 derived. <i>rnf-nifLA</i> intergenic region swapped by the reciprocal <i>A. vinelandii</i> region.            | This study |
| Ps_EK <sup>C</sup> -tetA      | Ps_ <i>nifLA</i> <sup>C</sup> derived, but Ps_ <i>nifAE356K</i> + <i>tetA</i> (Tc <sup>R</sup> )                    | This study |
| Ps_EK <sup>C</sup>            | Ps_EK <sup>C</sup> -tetA derived, but <i>tetA</i> cured with pMB2006                                                | This study |
| Ps_EK                         | A1501 derived, Ps_ <i>nifAE356K</i>                                                                                 | This study |
| <i>E. coli</i>                |                                                                                                                     |            |
| ET8000                        | <i>rbs lacZ::IS1 gyrA hutC</i> . Used for $\beta$ -galactosidase assays                                             | [5]        |
| NEB 5-alpha                   | Derivative of DH5 $\alpha$ . T1 phage resistant and <i>endA</i> deficient. Used for cloning and plasmid maintenance | NEB        |
| ST18                          | <i>E. coli</i> S17 $\lambda$ pir $\Delta hemA$ . Used for conjugations                                              | [6]        |

Abbreviations: Mo-Nif<sup>-</sup>: no molybdenum-dependent nitrogenase activity; Rif: rifampicin, Km: kanamycin, Tc: tetracycline, Tp: trimethiorim, <sup>R</sup>: resistance

### S1 Table References

1. Setubal JC, dos Santos P, Goldman BS, Ertesvåg H, Espin G, Rubio LM, et al. Genome Sequence of *Azotobacter vinelandii*, an Obligate Aerobe Specialized To Support Diverse Anaerobic Metabolic Processes. *J Bacteriol.* 2009;191: 4534–4545. doi:10.1128/JB.00504-09
2. Barney BM, Eberhart LJ, Ohlert JM, Knutson CM, Plunkett MH. Gene Deletions Resulting in Increased Nitrogen Release by *Azotobacter vinelandii*: Application of a Novel Nitrogen Biosensor. *Appl Environ Microbiol.* 2015;81: 4316–4328. doi:10.1128/AEM.00554-15
3. You C, Zhou F. Non-nodular endorhizospheric nitrogen fixation in wetland rice. *Can J Microbiol.* 1989;35: 403–408. doi:10.1139/m89-062
4. Vermeiren H, Willems A, Schoofs G, de Mot R, Keijers V, Hai W, et al. The rice inoculant strain *Alcaligenes faecalis* A15 is a nitrogen-fixing *Pseudomonas stutzeri*. *Syst Appl Microbiol.* 1999;22: 215–24. doi:10.1016/S0723-2020(99)80068-X
5. MacNeil T, Roberts GP, MacNeil D, Tyler B. The products of *glnL* and *glnG* are bifunctional regulatory proteins. *Mol Gen Genet MGG.* 1982;188: 325–333. doi:10.1007/BF00332696
6. Thoma S, Schobert M. An improved *Escherichia coli* donor strain for diparental mating. *FEMS Microbiol Lett.* 2009;294: 127–132. doi:10.1111/j.1574-6968.2009.01556.x
