# Supplementary material for: Disrupting hierarchical control of nitrogen fixation enables carbon-dependent regulation of ammonia excretion in soil diazotrophs
Source: PubMed Central journal article supplement (PMC8219145; doi:10.1371/journal.pgen.1009617), 2021-06-10
Supplement: pgen.1009617.s012.pdf [file pgen.1009617.s012.pdf]

**S3 Table. Primers used in this study**

| ID     | Sequence 5' -> 3'                                 | Application                                                                                     |
|--------|---------------------------------------------------|-------------------------------------------------------------------------------------------------|
| AAS-3  | GAATGCCCATGAATGCAACCAT                            | Amplification of Av- <i>nifA</i> for genotyping                                                 |
| AAS-55 | TCAGATCTTGCGCATGTGGATGT                           |                                                                                                 |
| 2-43   | AAAAGGATCCCTCATGTTTGACAGCTTATC                    | Amplifies the <i>tetA</i> cassette from pALMAR3 for Av- <i>nifH</i> insertion                   |
| 2-44   | AAAAGAATTCTTGATTGGCTCCAATTCTTG                    |                                                                                                 |
| 2-45   | AAAAGGATCCGTCACCTGAACTCTCCTGCTGAGG                | Amplifies 1874 pb of Av- <i>nifHD</i> (position 136301 – 138174)                                |
| 2-46   | AAATAAGCTTTCCACTTCGTCGATCAGTTTGGCG                |                                                                                                 |
| 5-49   | GAGTTGTTTCGCTTTTCTACGGAATCATTGGTGATTTCCGG         | Amplifies 409 bp corresponding to the Av- <i>nifH</i> promoter (position 136401 – 136809)       |
| 5-50   | TGTA AAAACGACGGGATCCCCGACTTACCGATACCA CC          |                                                                                                 |
| 5-46   | GGGGATCCCGTCGTTTTTACAACGTCGTG                     | Amplifies the <i>lacZ</i> gene (3057 bp) and from pRT22                                         |
| 5-464  | CTAGCGGTTATTATTATTTTTTGGACACCAGACCAACT G          |                                                                                                 |
| 7-28   | CGAATTCGAGCTCGGTACCCCCATGGAAACGGTGGG GAACTG       | Amplifies 906 bp upstream Av- <i>glnE</i> (position 4547284 – 4548189)                          |
| 7-29   | AATTATCCATACTGTGCGCGAGCGTGCC                      |                                                                                                 |
| 7-30   | CGGCGACAGTATGGATAATTACGAACC                       | Amplifies a 631 bp fragment from pUC18T-mini-Tn7T-Tp encoding to the <i>tmp</i> resistance gene |
| 7-31   | CCGGCTGCTTTAATAACCGCTAGATAAATCTTAG                |                                                                                                 |
| 7-32   | GCGGTTATTAAAGCAGCCGGGCGTGTTG                      | Amplifies 752 bp downstream Av- <i>glnE</i> (position 4543778 – 45444529)                       |
| 7-33   | GTCGACTCTAGAGGATCCCCGCCTTCCGGATCGAGC AGC          |                                                                                                 |
| 3-75   | AAGCTTATCGATGATAAGCTG                             | Amplification of 2421 bp from pR34 excluding Av- <i>nifLA</i>                                   |
| 4-14   | ATGGTGCTCGTCTATCCGAA                              |                                                                                                 |
| 4-17   | GGAAGCTCGCATGAACGCCACATTCGCC                      | Amplification of Ps- <i>nifA</i> for constructing pMB1804                                       |
| 4-18   | CGATAAGCTTTCAGATCTTGCGCATATGAATG                  |                                                                                                 |
| 4-19   | GAGGCACCATATGGCTTTGCAACGGATACC                    | Amplification of Ps- <i>nifL</i> for constructing pMB1804                                       |
| 4-20   | TGGCGTTCATGCGAGCTTCCCTGTCAG                       |                                                                                                 |
| 4-21   | CGCGACCTGAAGCATGAGGTGGAG                          | Introducing E356K mutation into Ps- <i>nifA</i>                                                 |
| 4-22   | CGCGACCTGAAGCATGAGGTGGAG                          |                                                                                                 |
| 3-74   | CAGCTTATCATCGATAAGCTTTCAGATCTGCCGCAC CTTGAT       | Amplification of Ao- <i>nifA</i> for constructing pMB1806                                       |
| 3-74B  | GACCTGGAGGGCGGTTCGATGAGCGCGCCGGTCCGA TG           |                                                                                                 |
| 4-12   | CATCGGACCGGCCGCGCTCATCGACCGCCCTCCAGG TC           | Amplification of Ao- <i>nifL</i> for constructing pMB1806                                       |
| 4-13   | TTCGGATAGACGAGGCACCATATGGGCGCTGTCGCC GACG         |                                                                                                 |
| 2-37   | ACCAACCGCGACCTCAAGCTCGAGGTCGAAAGCG                | Introducing E351K mutation into Ao- <i>nifA</i>                                                 |
| 2-38   | CGCTTCGACCTCGAGCTTGAGGTCGCGGTTGGT                 |                                                                                                 |
| 8-1    | TGATTACGAATTCGAGCTCGGTACCCCTCAGTCTTCG GTTTCCGCGCT | Amplification of 847 bp downstream Ps- <i>nifA</i>                                              |
| 8-2    | GCGCAAGATCTGAACGACCCGCCCG                         |                                                                                                 |
| 8-3    | TCGGGCGGGTCGTTTCAGATCTTGCG                        | Amplification of Ps- <i>nifLAE356K</i> (2364 bp) fragment from pMB1805                          |
| 8-11b  | CTCTAGAGGATCCCCACCGGGCTGCGCCAGCAA                 |                                                                                                 |

|             |                                        |                                                                                |
|-------------|----------------------------------------|--------------------------------------------------------------------------------|
| 8-13        | ACATGAGCCCGGGTCGGGC                    | Linearizes the pMB2006 by PCR for <i>tetA</i> insertion                        |
| 8-14        | CCAATCAAAGTCGGGCGGGTCG                 |                                                                                |
| 8-15        | GCCCGACTTTGATTGGCTCCAATTCTTGGAGTG      | Amplifies the <i>tetA</i> cassette from pALMAR3 for insertion into pMB2006     |
| 8-16        | GACCCGGGCTCATGTTTGACAGCTTATCATCGATTAGC |                                                                                |
| 8-17        | TCGAGCTCGGTACCCTCAGGCGGCCCT            | Amplification of Ps- <i>rnfAB</i> (1160bp)                                     |
| 8-18        | GAGGTGCGTTATGGAATATGCGCTGTTTCTGATCG    |                                                                                |
| 8-19        | CATATTCCATAAGCGACCTCACCTGCT            | Amplification of the <i>A. vinelandii rnf-nifLA</i> intergenic region (444 bp) |
| 8-20        | AAAGCCATGCTGTGCCTCGTCTATCCA            |                                                                                |
| 8-21        | GCACAGCATGGCTTTGCAACGGATACCG           | Amplification of Ps- <i>nifL</i> (1638 bp)                                     |
| 8-22        | GACTCTAGAGGATCCCCTCAGCTGGCCGAGAAGGG    |                                                                                |
| M13F (-47)  | CGCCAGGGTTTTCCAGTCACGAC                | Sequencing and PCR linearization of constructs                                 |
| M13R (-48)  | AGCGGATAACAATTTACACAGGA                |                                                                                |
| Av-RTgyrBF  | CAAGAAGCACAAAGGTGACGA                  | RT-qPCR <i>A. vinelandii gyrB</i>                                              |
| Av-RTgyrBR  | TGGTCTGCGAACTGAACTTG                   |                                                                                |
| AvRTnifH-3F | CAGCCCTGGCTGAGATGGG                    | RT-qPCR <i>A. vinelandii nifH</i>                                              |
| AvRTnifH-3R | ATGGTGTTCTGGGCCTTGA                    |                                                                                |
| Av-RTnifLF  | CTGCTGACCATCAACGACAT                   | RT-qPCR <i>A. vinelandii nifL</i>                                              |
| Av-RTnifLR  | ATGCCTTCCAGCAGCTCTT                    |                                                                                |
| Av-RTnifAF  | GCAAGTACGGCTTCGAGAAC                   | RT-qPCR <i>A. vinelandii nifA</i>                                              |
| Av-RTnifAR  | GTACGGTGCTGTTCCACTTG                   |                                                                                |
| Ps-RTgyrB2F | AAACCATCCGCCGAGACCTT                   | RT-qPCR <i>P. stutzeri gyrB</i>                                                |
| Ps-RTgyrB2R | CCCACCCCGGAGTTGAGAAA                   |                                                                                |
| Ps-RTnifH1F | CCACGACCCAGAACCTCGTG                   | RT-qPCR <i>P. stutzeri nifH</i>                                                |
| Ps-RTnifH1R | GAGTGCAGGATCAGGCGAGT                   |                                                                                |
| Ps-RTnifL2F | AGGACATGCACATGACCCAGG                  | RT-qPCR <i>P. stutzeri nifL</i>                                                |
| Ps-RTnifL2R | CACGGCTTGCTGGAACACTT                   |                                                                                |
| Ps-RTnifA7F | TCCTCAAGCATGGCAACAGC                   | RT-qPCR <i>P. stutzeri nifA</i>                                                |
| Ps-RTnifA7R | GAAGGGCAGGTCCATGTTCGTA                 |                                                                                |
